# Supplementary material for: Unique formation of two different W/Ag/S clusters from the same components via a low heating temperature solid state reaction and a solution reaction and their third-order NLO properties in solutionElectronic supplementary information (ESI) available: experimental: general comments, synthesis of complexes, third-order NLO measurements, time response spectra. See http://www.rsc.org/suppdata/cc/b1/b107251j/
Source: Royal Society of Chemistry journal article supplement (doi:10.1039/b107251j), 2001-11-16
Supplement: b107251j.doc [file b107251j.doc]

**Supplementary Information**

1. **Experimental**
   1. **General Comments**

(NH4)2[WS4] 1 and [Ag(MeCN)4](PF6) 2 were prepared as reported previously. Dppm and other reagents was obtained from commercial sources and used as received. All solvents were predried over activated molecular sieves and refluxed over the appropriate drying agents under argon. The IR spectra were recorded on a Perkin Elmer 2000 FT-IR spectrometer as KBr disk (4000-400 cm-1). 1H NMR spectra were recorded at ambient temperature on a Varian UNITYplus-500 spectrometer. 1H NMR chemical shifts were referenced to the CDCl3 signal. UV-Vis spectra were measured on JASCO V-560 spectrophotometer. The elemental analyses for C, H, N, and S were performed on a LECO-CHNS microanalyzer.

- 1. **Synthesis of the complexes**

**[(WS4)2Ag4(dppm)3]** (**1**): A well-ground mixture of (NH4)2[WS4] (0.18 g, 0.5 mmol), [Ag(MeCN)4](PF6) (0.42 g, 1.0 mmol), and dppm (0.77 g, 2.0 mmol) was placed in an open Pyrex glass tube, and then heated at 110 ˚C for 1d. During this time, the mixture gradually became molten and its color turned from yellow to brown yellow. After the molten mixture was allowed to cool to room temperature, it was extracted with CH2Cl2 (20 mL) and filtered to give a brown yellow solution. Brown yellow crystals of [(WS4)2Ag4(dppm)3] (**1**) were isolated by layering Et2O (20 mL) onto the solution for 1 day, which were collected by filtration and washed with CH2Cl2/Et2O (1 : 4) and dried *in vacuo*. Yield: 0.12 g (22 % based on Ag). Anal. Calcd. for C75H66Ag4P6S8W2: C, 40.78; H, 3.02; S, 8.71. Found: C, 40.56; H, 3.09; S, 8.96. UV-vis (CH2Cl2) (**max/nm (**/M-1cm-1)): 279 (59400), 411 (21000). IR (KBr disc): (W-St) 499 (s), (W-Sbr) 472 (m), 459 (s), 440 (m) cm-1. 1H NMR (CDCl3, 500 MHz): **(m, 60H, PPh2), 3.53 (br s, 6H, CH2)( *w*1/2 = 19 Hz).

**[WS4Ag3(dppm)4](PF6)** (**2**): A mixture of (NH4)2[WS4] (0.18 g, 0.5 mmol), [Ag(MeCN)4](PF6) (0.42 g, 1.0 mmol), and dppm (0.77 g, 2.0 mmol) in CH2Cl2 (40 mL) was stirred in air at ambient temperature for 1 d. Some of the unreacted (NH4)2[WS4] was filtered off and the yellow filtrate was reduced to ~10 mL. Yellow prisms of [WS4Ag3(dppm)4](PF6) (**2**) were isolated by layering diethyl ether (10 mL) onto the solution for one week, which were collected by filtration and washed with CH2Cl2/Et2O (1 : 4) and dried *in* *vacuo*. Yield: 0.40 g (52 % based on Ag). Anal. Calcd. for C100H88Ag3F6P9S4W: C, 51.81; H, 3.83; S, 5.53. Found: C, 51.58; H, 3.79; S, 5.39. UV-vis (CH2Cl2) (**max/nm (**/M-1cm-1)): 412 (9700). IR (KBr disc): (W-Sbr) 470 (m), 435 (w) cm-1. 1H NMR (CDCl3, 500 MHz): **(m, 80 H, PPh2), 3.11 (br s, 8H, CH2) (*w*1/2 = 33 Hz).

**1.3. X-ray structure determination**

Crystals of **1**·CH2Cl2 and **2**·2C6H6·Et2O suitable to X-ray analysis were obtained from recrystallization in CH2Cl2/C6H6/Et2O. Compounds **1·**CH2Cl2 and **2·**2C6H6·Et2O were examined with either a Quantum CCD area detector coupled with a Rigaku AFC7 diffractometer (**1·**CH2Cl2) or a MSC/ADSC Quantum 1 CCD detector (**2·**2C6H6·Et2O). All calculation performed with the teXsan crystallographic software package of Molecular Structure Corporation (1999).3 A brown yellow prism of **1·**CH2Cl2 with dimensions 0.30 × 0.40 × 0.35 mm and a yollow prism of **2·**2C6H6·Et2O with dimensions 0.20 × 0.15 × 0.10 mm were coated with grease and mounted on a glass fiber, and cooled at –80 °C in a liquid nitrogen stream. The collection time were set as 3h, 6s/frame for **1·**CH2Cl2, and 8h, 30s/frame for **2·**2C6H6·Et2O. Cell parameters were determined from 281 reflections (6 frames) (**1·**CH2Cl2) and 107 reflections (6 frames) (**2·**2C6H6·Et2O) and refined using D*TREK software.4 A total of 18404 (**1·**CH2Cl2) and 24943 (**2·**2C6H6·Et2O) reflections was collected in the range of 2**max = 55°. Data reduction was performed with D*TREK program package, and an absorption correction was performed using 4th 3D + 4th 2D method of the REQAB program which led to transmission factors Tmin/Tmax values = 0.681/1.000 (**1·**CH2Cl2) and 0.740/1.013 (**2·**2C6H6·Et2O), respectively. The data were also corrected for Lorentz and polarization effects.

The structure of **1·**CH2Cl2 was solved by direct methods,5 while that of **2·**2C6H6·Et2O was solved by the heavy-atom Patterson method,6 and expanded using Fourier techniques.7 All non-hydrogen atoms (except those of CH2Cl2 in **1·**CH2Cl2, and those of F, O, C atoms of PF6-, benzene, and diethyl ether crystal solvent molecules in **2**) were refined anisotropically. The hydrogen atoms except those on diethyl ether molecules in **2·**2C6H6·Et2O were put on the calculated positions (C–H = 0.97 A) and allowed to ride on their attached C atoms. For **1·**CH2Cl2, C(76), Cl(1) and Cl(2) atoms show the relatively high thermal parameters, which were mainly due to the evaporation of part of the CH2Cl2 crystal solvent during the period of picking up and cutting into a suitable crystal from a big crystal. For **2·**2C6H6·Et2O, the relatively high thermal parameters of the F atoms of PF6- anion showed sign of disorder. However attempts to refine this disorder failed. Besides, C atoms (C(107)-C(112)) of one benzne molecule, and O and C atoms of the diethyl ether showed higher thermal parameters, which may be due to the evaporation of part of these two molecules during the period of picking up and mounting the crystal used in the measurement. The final cycle of full matrix least-squares refinements was based on 16469 (**1·**CH2Cl2) and 20653 (**2·**2C6H6·Et2O) observed reflections (*I* > 1.0**(*I*)) and 868 (**1·**CH2Cl2) and 1176 (**2·**2C6H6·Et2O) variable parameters, and converged with *R* = |*F*o|-|*F*c|)/|*F*o| = 0.041 (**1·**CH2Cl2) or 0.060 (**2·**2C6H6·Et2O), *Rw* = [w|*F*o|-|*F*c|]2/|*F*o|2 = 0.056 (**1·**CH2Cl2) or 0.071 (**2·**2C6H6·Et2O) (w = 1/[**c2(*F*o) + 0.00031*F*o2]). GOF = [*w*|*F*o|-|*F*c|]2/(*N*o-*N*v)]1/2 = 2.02 (**1·**CH2Cl2) or 2.35 (**2·**2C6H6·Et2O) (*N*o = number of observations and *N*v = number of variables). The standard deviations of an observation of unit weight are 2.02 (**1·**CH2Cl2) and 2.37 (**2·**2C6H6·Et2O), respectively. The maximum and minimum residual peaks on the final difference Fourier map are 2.29/-1.22 (**1·**CH2Cl2) and 2.70/-1.08 (**2·**2C6H6·Et2O) e/Å3. Atomic scattering factors and corrections for anomalous dispersion were taken from the *International Tables for Crystallography*.8 For details of the crystal data of **1·**CH2Cl2 and **2·**2C6H6·Et2O, please see CIF files.

**1.4. Third-order NLO measurements**

The third-order optical non-linearities of the complexes were measured by phase conjugated forward three-dimensional degenerate four-wave mixing (3D DFWM) technique 9, 10 as depicted in Figures **a** and **b**. After passing through a quarter wavelength plate, the pulse laser beam (wavelength 532 nm, pulse-width 15 ps, repetition rate 10 Hz, peak irradiance 10 GW/cm2), from a frequency-doubled picosecond pulse mode-locked Nd:YAG laser, is split into three beams k1, k2 andk3 with same energy by use of reflecting beam splitters, then temporally and spatially overlapped in the sample with a 205 mm focal-length len. The angles between the three beams k1, k2 andk3 are about 1o. In the experiment, the intensity I4 of the phase conjugate beam k4 is detected by PIN photodiode. According to the following formula, the third-order NLO coefficients (3) can be measured by compared the measured signals for **1** and **2** with that for CS2 as reference under the same experimental conditions11:

where  is the absorption coefficient, *n* is the nonlinear refractive index, *L* is the thickness of the sample and *I* is intensity, the subscript *r* refers to CS2, and the tensor element (3)CS2 = 6.810-13 *esu* for CS2.12 No third-order NLO response was found for the pure CHCl3 and CH3CN solvent in the experiment conditions. Figures 1~2 show the time response spectra for the third-order nonlinearities of [(WS4)2Ag4(dppm)3] in CHCl3, [WS4Ag3(dppm)4] in CH3CN. The third-order NLO coefficients for **1** and **2** are listed as follows.

**Cluster** concentration solvent 3 (esu) (ps)

[(WS4)2Ag4(dppm)3] (**1**) 1.0×10-3 M CHCl3 2.259×10-14 27.6

[WS4Ag3(dppm)4](PF6) (**2**) 1.0×10-3 M CH3CN 5.611×10-15 24.0

**References**

1. J. W. McDonald, G. D. Friesen, L. D. Rosenein, W. E. Newton, *Inorg. Chim. Acta*, 1983, **72**, 205.
2. S. S. D. Brown, I. D. Salter, *Organomet. Synth*., 1986, **3**, 315.

3. TEXSAN, *The TEXSAN single Crystal Structure Analysis Software*, Version 1.10; Molecular Structure Corporation (MSC), 3200 Research Forest Drive, The Woodlands, TX 77381, USA, 1999.

4. D*TREK, *The MSC D*TREK software package*; Rigaku/MSC, Inc., 9009 New Trails Drive, The Woodlands, TX 77381, USA, 1998.

5. Altomare, M. C. Burla, M. Camalli, M. Cascarano, C. Giacovazzo, A. Guagliardi, G. Polidori, *SIR92*. *J. Appl. Cryst*., 1994, **27**, 435.

6. Beurskens, P. T.; Admiraal, G.; Beurskens, G.; Bosman, W. P.; Garcia-Granda, S.; Gould, R. O.; Smits, J. M. M.; Smykalla, C. *PATTY*: *The DIRDIF program system*; *Technical Report of the Crystallography Laboratory*; University of Nijmegen: Nijmegen, The Netherlands, 1992.

7. Beurskens, P. T.; Admiraal, G.; Beurskens, G.; Bosman, W. P.; de Gelder, R.; Israel, R.; Smits, J. M. M. *DIRDIF94*: *The DIRDIF-94 program system*; *Technical Report of the Crystallography Laboratory*; University of Nijmegen: Nijmegen, The Netherlands, 1994.

8. Cromer, D. T.; Waber, J. T. *International Tables for Crystallography*; The Kynoch Press: Birmingham, U. K. 1974; Vol. IV. Table 2.2 A.

9. C. Maloney, H. Byrne, W. M. Dennis, and W. Blau, *Chem. Phys*., 1988, **121**, 21.

10. L. –N. Yang, R. Dorsinville, Q. –Z. Wang, W. –K. Zou, P. –P. Ho, N. –L. Yang, and R. R. Alfano, *J. Opt. Soc. Am. B*, 1989, **6(4)**, 753 .

11. R. W. Boyd, *Nonlinear Optics*, San Diego: Academatic Press, INC, 1992, p159.

12. N. P. Xuan, J. L. Ferrier, J. Gazengel and G. Rivoire, *Opt. Commun*., 1984, **51**, 433.

Fig. S1 The time response spectrum for the third-order nonlinearities of [(WS4)2Ag4(dppm)3] (**1**) in CHCl3

Fig. S2 The time response spectrum for the third-order nonlinearities of [WS4Ag3(dppm)4] (**2**) in CH3CN
